# Supplementary material for: Maternal Resources, Pregnancy Concerns, and Biological Factors Associated to Birth Weight and Psychological Health
Source: PubMed Central journal article supplement (PMC7916643; doi:10.3390/jcm10040695), 2021-02-10
Supplement: jcm-10-00695-s001.pdf [file jcm-10-00695-s001.pdf]

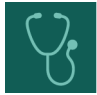

**Table S1.** Descriptive and correlations between psychological variables.

| Variable                             | Mean | SD  | 1     | 2     | 3     | 4     | 5    | 6     | 7     | 8     | 9     | 10   |
|--------------------------------------|------|-----|-------|-------|-------|-------|------|-------|-------|-------|-------|------|
| 1. Negative Affectivity <sup>1</sup> | 2.0  | 0.7 |       |       |       |       |      |       |       |       |       |      |
| 2. Anxiety <sup>1</sup>              | 0.9  | 0.5 | 0.7*  |       |       |       |      |       |       |       |       |      |
| 3. Optimism <sup>1</sup>             | 3.5  | 0.7 | -0.2* | -0.4* |       |       |      |       |       |       |       |      |
| 4. Resilience <sup>1</sup>           | 6.0  | 0.6 | -0.3* | -0.4* | 0.4*  |       |      |       |       |       |       |      |
| 5. Family-Work Conflict <sup>2</sup> | 0.9  | 0.7 | 0.2*  | 0.3*  | -0.1  | -0.04 |      |       |       |       |       |      |
| 6. Pregnancy Concerns <sup>2</sup>   | 1.7  | 0.5 | 0.3*  | 0.4*  | -0.2* | -0.2  | 0.3* |       |       |       |       |      |
| 7. General Resources <sup>2</sup>    | 2.1  | 0.7 | 0.2*  | 0.2*  | -0.1  | -0.3* | 0.2* | 0.3*  |       |       |       |      |
| 8. Life Satisfaction <sup>2</sup>    | 5.5  | 0.9 | -0.1  | -0.2  | 0.2*  | 0.3*  | -0.3 | -0.3* | -0.4* |       |       |      |
| 9. Depression <sup>3</sup>           | 0.8  | 0.5 | 0.4*  | 0.3*  | -0.2  | -0.2* | 0.2  | 0.3*  | 0.2*  | -0.3* |       |      |
| 10. Resilience <sup>3</sup>          | 5.5  | 1.5 | -0.2* | -0.2  | 0.2*  | 0.2*  | -0.1 | -0.1  | -0.1  | 0.2   | -0.6* |      |
| 11. Optimism <sup>3</sup>            | 3.4  | 0.6 | -0.2* | -0.3* | 0.7*  | 0.3*  | -0.1 | -0.1  | -0.2  | 0.2*  | -0.4* | 0.4* |

Standard Deviation (SD). <sup>1</sup> At 9 week of gestation; <sup>2</sup> at 24 week of gestation; <sup>3</sup> at 36 week of gestation. \* *p*-value < 0.05 by Pearson's coefficients.
